# Supplementary material for: Rescue of non-healing, degenerative salivary glands by cholinergic-calcium signaling
Source: PubMed Central journal article supplement — bioRxiv. 2025 Feb 28:2024.12.31.630834. Originally published 2025 Jan 2. Preprint. [Version 2] doi: 10.1101/2024.12.31.630834 (PMC11722244; doi:10.1101/2024.12.31.630834), 2025-02-28
Supplement: NIHPP2024.12.31.630834v1-supplement-1.pdf [file NIHPP2024.12.31.630834v1-supplement-1.pdf]

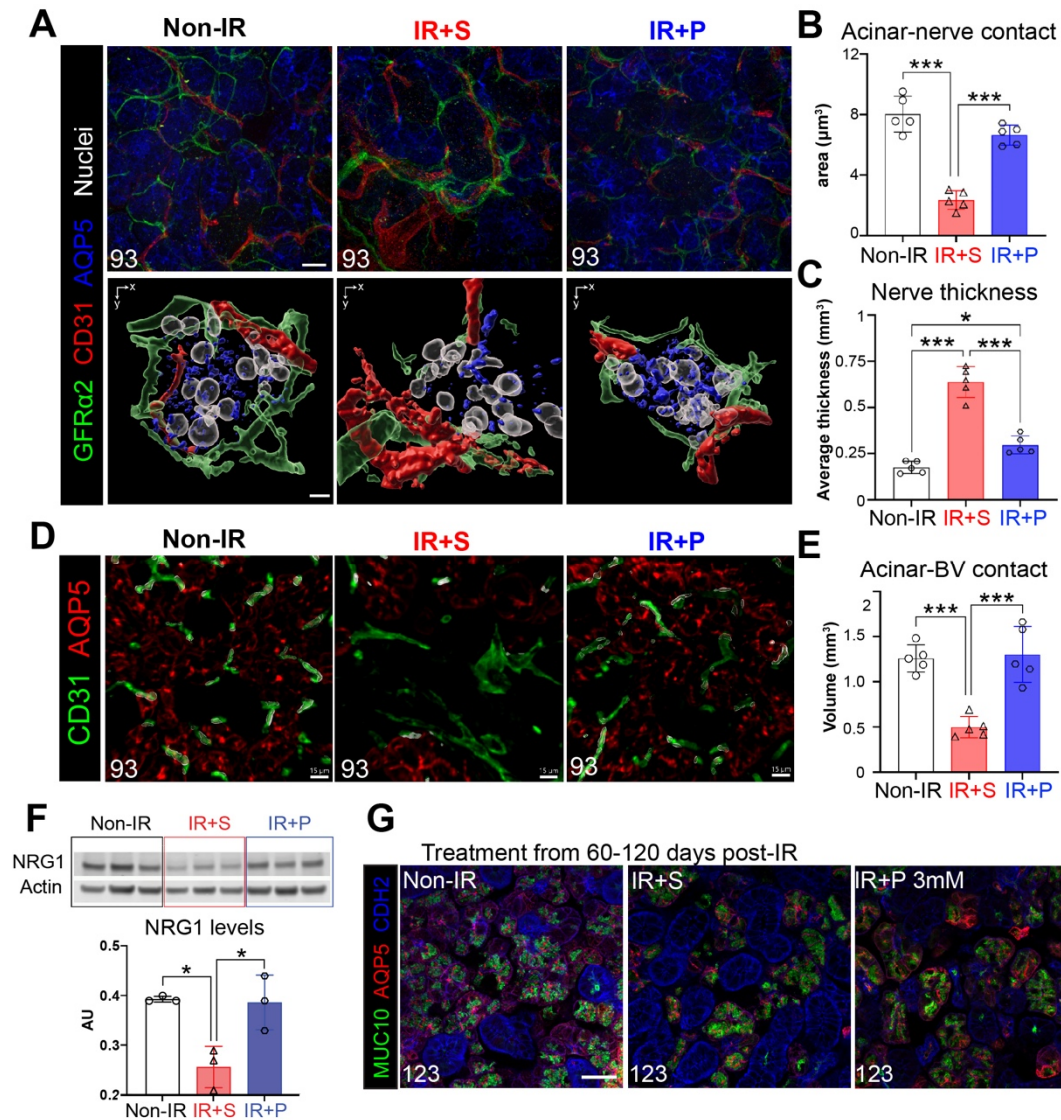

**Figure S1. Chronic degeneration is reversed by muscarinic agonism, related to Figure 1.** **A-C.** Immunofluorescent imaging (upper panel) and 3D reconstruction (IMARIS, lower panel) of the acinar (AQP5)-nerve (GFR $\alpha$ 2)-capillary (CD31) interactions in SGs of different treatment groups at 93 days post-IR (treatment at 30-90 days post-IR). Quantification of acinar-nerve interactions (B) and large nerve fibers (E). **D-E.** Immunofluorescent imaging (D) and quantification (E) of blood vessels within the SGs of the different experimental groups at 93 days post-IR (treatment at 30-90 days post-IR). **F.** Protein expression and quantification of NRG1 and actin in SG samples at 93 days post-IR. AU, arbitrary units, normalized to actin. **G.** Images of MUC10 $^+$ AQP5 $^+$  acinar cells of SGs treated 60-120 days post-IR with 3 mM pilocarpine (IR+ P, 3 mM). Tissue was analyzed at 123 days post-IR. Scale bar in A upper panel and G are 20  $\mu\text{m}$ , A lower panel is 5  $\mu\text{m}$  and D is 15  $\mu\text{m}$ . Mean $\pm$ SD. \*,  $P < 0.05$ . \*\*\*,  $P < 0.001$ .

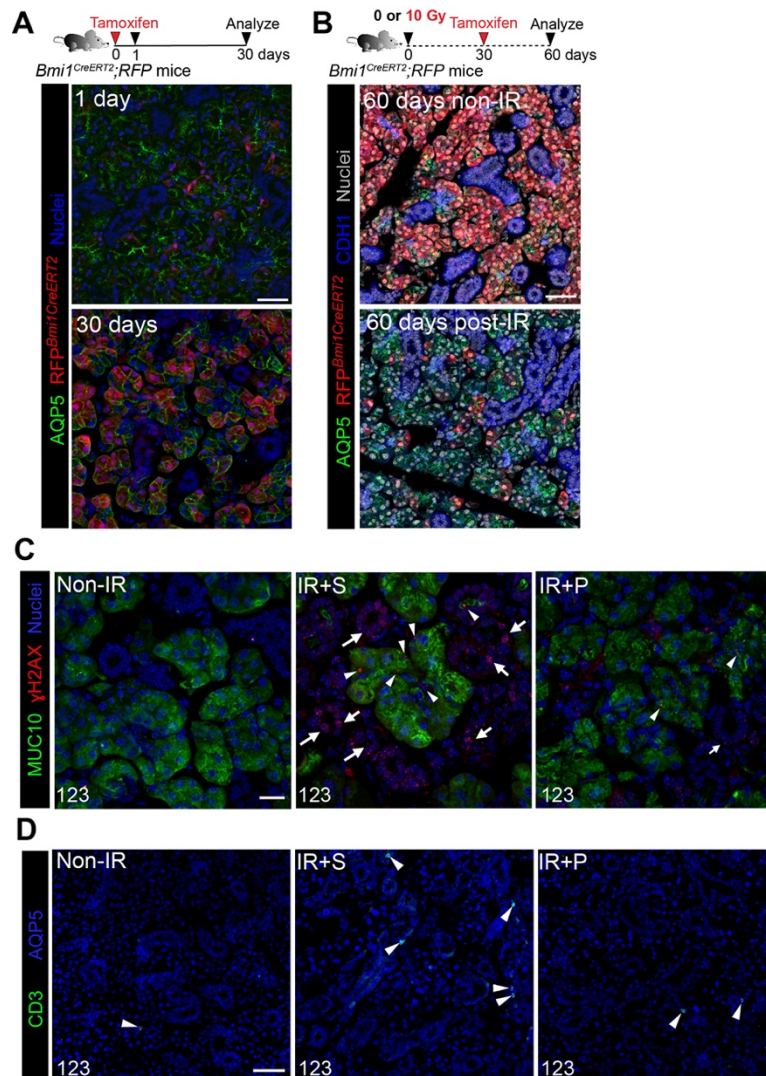

**Figure S2. Reversal of chronic SG degeneration is sustained after treatment termination, related to Figure 2.** **A.** Lineage tracing of *Bmi1<sup>CreERT2</sup>;Rosa26<sup>RFP</sup>* mice for 1 and 30 days after Cre activation. Mice were injected with tamoxifen at day 0 and immunostained for AQP5 at day 30. **B.** *Bmi1<sup>CreERT2</sup>;Rosa26<sup>RFP</sup>* mice were treated with 0 or 10 Gy, injected with tamoxifen at 30 days post-IR and immunostained for AQP5 and CDH1 at day 60. **C.** Immunostaining of DNA damage ( $\gamma$ H2AX, C) in non-IR, IR+S and IR+P (3 mM, 30-90 days post-IR) at 123-days post-IR (30 days after treatment termination). MUC10 labels acinar cells. Arrowheads mark  $\gamma$ H2AX<sup>+</sup> acinar cells. Arrows mark  $\gamma$ H2AX<sup>+</sup> ducts. **D.** Immunostaining for CD3<sup>+</sup> T cells in the 3 groups at 123 days post-IR. Arrowheads mark CD3<sup>+</sup> cells. Scale bars, 20  $\mu$ m (A-B), 15  $\mu$ m (C) and 50  $\mu$ m (D).

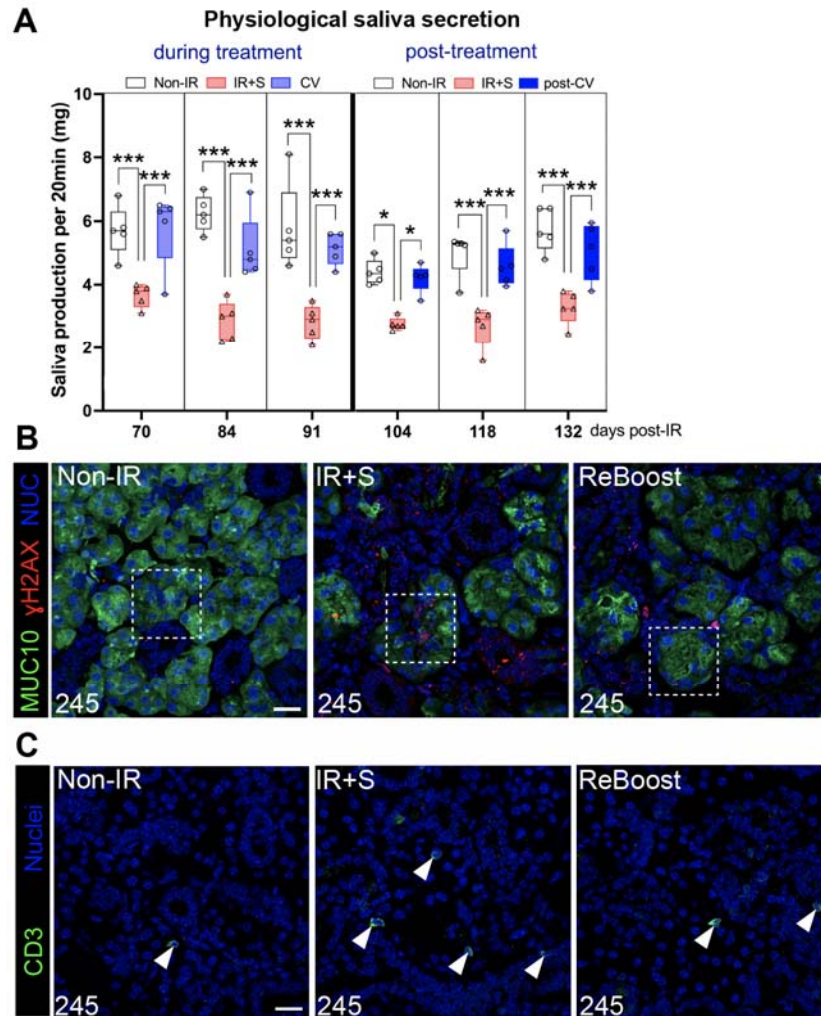

**Figure S3. IR SGs remain highly responsive to an additional round of muscarinic treatment delivered months after radiation exposure, related to Figure 3.** **A.** Physiological saliva secretion was measured during treatment (left) and after treatment termination at 90 days post-IR (right). **B.** Detection of DNA damage ( $\gamma$ H2AX) foci in acinar cells across the 3 treatment groups (non-IR, IR+S, and IR+ReBoost with CV). Inset shown in Figure 5H. **C.** Immunostaining of CD3+ T cells (arrowheads) in SGs across the groups. Mean $\pm$ SD. \*,  $P<0.05$ . \*\*,  $P<0.01$ . \*\*\*,  $P<0.001$ . Scale bars are 20 $\mu$ m.



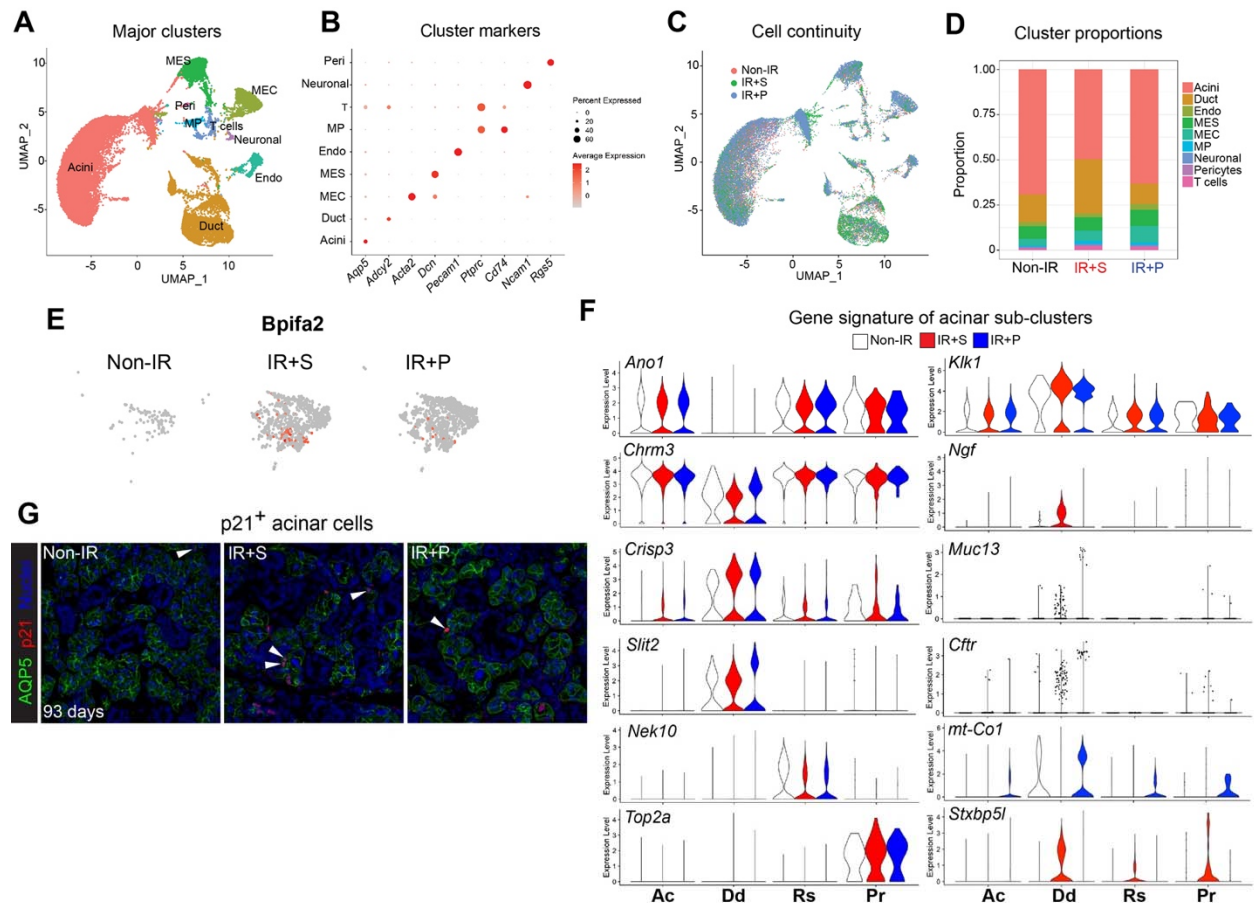

**Figure S4. De-differentiated acinar cells are greatly expanded in chronically degenerating SGs, an outcome reversed by muscarinic agonism, related to Figure 4.** **A.** Unbiased cluster analysis. MEC, myoepithelial cell. Peri, pericytes. MES, mesenchymal cell. Endo, endothelial. MP, macrophage. T, T cell. **B.** Integrated dot plot presents a specific marker gene for each of the 9 major clusters identified. **C.** UMAP plot of the integrated single nuclei from the 3 treatment groups, non-IR, IR+Saline (S), and IR+Pilocarpine (P, 3 mM) at 93 days post-IR. **D.** Bar plot showing the percentage of each cell type in each of the 3 treatment groups. **E.** *Bpifa2* is relatively enriched in de-differentiated (Dd) acini in the IR+S group, as compared to the non-IR and IR+P group. **F.** Violin plots showing gene expression signature in the 4 acinar sub-clusters across the 3 treatment groups. Ac, active. Dd, de-differentiated. RS, resting. Pr, proliferating. **G.** Immunostaining and confocal imaging of acini in cell cycle arrest, as marked by p21. Scale bar, 20 $\mu$ m. Arrows point to p21<sup>+</sup>AQP5<sup>+</sup> acini.

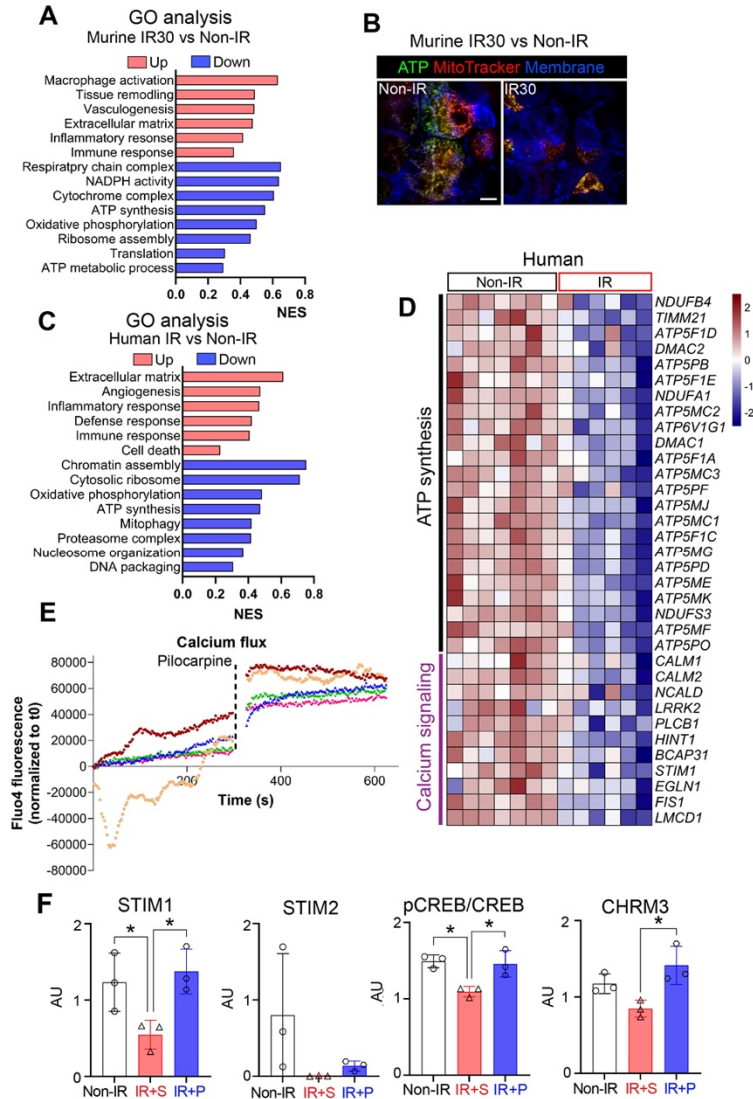

**Figure S5. Chronic degeneration is reversed through the restoration of mitochondrial metabolism and calcium signaling, related to Figure 5.** **A.** Gene Ontology (GO) analyses of murine non-IR versus 30 days post-IR SGs bulk RNA-seq datasets. **B.** Live imaging of ATP synthesis and active mitochondria (MitoTracker) in non-IR and 30 days post-IR murine SGs, cultured ex vivo for 24 hours. **C.** GO analysis of human non-IR versus IR SGs (>2 yrs post-radiation, GSE206878<sup>26</sup>) bulk RNA-seq datasets. **D.** Heatmap of ATP synthase and calcium signaling-related gene expression levels in human salivary glands, irradiated (IR) versus healthy (Non-IR). **E.** Calcium signaling levels, with or without muscarinic stimulation, measured by live imaging of Fluo-4 AM uptake by freshly harvested SGs. Each color represents a biological replicate **F.** Quantification of STIM1, STIM2, pCREB and CHRM3 protein levels in each condition determined by western blot (Figure 5F). Groups were normalized to actin. Mean±SD. \*,  $P < 0.05$ .

**Table S1: List of antibodies used.**

| <b>Antibody</b>                        | <b>Raised in</b> | <b>Dilution</b> | <b>Use</b> | <b>Source</b>             | <b>Catalog #</b> |
|----------------------------------------|------------------|-----------------|------------|---------------------------|------------------|
| <b>E-cadherin</b>                      | Rat              | 1:400           | IF         | Life Technologies         | 13-1900          |
| <b>Aquaporin 5</b>                     | Rabbit           | 1:200           | IF         | Millipore                 | AB3559           |
| <b>MUC10</b>                           | Goat             | 1:200           | IF         | Abcore                    | AC21-2394        |
| <b>AChE</b>                            | Mouse            | 1:200           | IF         | Thermofisher              | MA3-042          |
| <b>Parotid Secretory Protein (PSP)</b> | Guinea           |                 |            | Gift from Stefan Ruhl     |                  |
|                                        | Pig              | 1:500           | IF         |                           | N/A              |
| <b>CD3</b>                             | Rabbit           | 1:200           | IF         | Abcam                     | Ab5690           |
| <b>GFRa2</b>                           | Goat             | 1:100           | IF         | R&D Systems               | AF429            |
| <b>CD31</b>                            | Rat              | 1:300           | IF         | R&D Systems               | AF3628           |
| <b>SMA</b>                             | Mouse            | 1:300           | IF         | Sigma-Aldrich             | C6198            |
| <b>DCT</b>                             | Rabbit           | 1:200           | IF         | abcam                     | ab221144         |
| <b>TH</b>                              | Rabbit           | 1:200           | IF         | Sigma-Aldrich             | AB152            |
| <b>γH2AX</b>                           | Rabbit           | 1:500           | IF         | Cell Signaling Technology | 9718S            |
| <b>p21</b>                             | Rat              | 1:200           | IF         | abcam                     | ab107099         |
| <b>TUBB3</b>                           | Mouse            | 1:200           | IF         | Biologend                 | 801202           |
| <b>ATP5A1</b>                          | Rabbit           | 1:200           | IF         | ProteinTech               | 14676-1-AP       |
| <b>NKCC1</b>                           | Goat             | 1:400           | IF         | Santa Cruz                | sc-21545         |
| <b>STIM1</b>                           | Rabbit           | 1:1000          | WB         | ProteinTech               | 11565-1-AP       |
| <b>STIM2</b>                           | Mouse            | 1:1000          | WB         | Millipore                 | ABF218           |
| <b>Phospho-CREB (Ser133)</b>           | Rabbit           | 1:1000          | WB         | Cell Signaling Technology | 9198S            |
| <b>CREB1</b>                           | Rabbit           | 1:1000          | WB         | Millipore                 | Ab3006           |
